# Supplementary material for: The high mobility group A2 protein epigenetically silences the Cdh1 gene during epithelial-to-mesenchymal transition
Source: PubMed Central journal article supplement (PMC4288184; doi:10.1093/nar/gku1293), 2014-12-09
Supplement: supp_gku1293_nar-01612-v-2014-File009.pdf [file supp_gku1293_nar-01612-v-2014-File009.pdf]

## SUPPLEMENTARY DATA

### The High Mobility Group A2 protein epigenetically silences the *Cdh1* gene during epithelial-to-mesenchymal transition

E-Jean Tan, Kaoru Kahata, Oskar Idås, Sylvie Thuault, Carl-Henrik Heldin, and Aristidis Moustakas

## SUPPLEMENTARY TABLES

**Supplementary Table S1.** Oligonucleotides used in quantitative real-time PCR reactions for mRNA analysis.

| Gene          | Species | Primer Sequence                                                              | Product size (bp) | Accession number |
|---------------|---------|------------------------------------------------------------------------------|-------------------|------------------|
| <i>Gapdh</i>  | mouse   | fwd 5'- TGTGTCCGTCGTGGATCTGA -3'<br>rev 5'- CCTGCTTCACCACCTTCTTGA -3'        | 77                | NM_008084        |
| <i>Dnmt1</i>  | mouse   | fwd 5'- CCAAGCTCCGGACCCTGGATGTGT -3'<br>rev 5'- CGAGGCCGGTAGTAGTCACAGTAG -3' | 373               | NM_010066        |
| <i>Dnmt3a</i> | mouse   | fwd 5'- ATGTGGTTCGGAGATGGCAAG -3'<br>rev 5'- AGATGGCTTTGCCGTACATGG -3'       | 124               | NM_007872        |
| <i>Dnmt3b</i> | mouse   | fwd 5'- CAAGGAGGGCGACAACCGTCCATT -3'<br>rev 5'- TGTTGGACACGTCCGTGTAGTGAG -3' | 221               | NM_010068        |
| <i>Cdh1</i>   | mouse   | fwd 5'- GACTGTGAAGGGACGGTCAAC -3'<br>rev 5'- CCACCGTTCTCCTCCGTAGA -3'        | 151               | NM_009864        |
| <i>MMP1</i>   | human   | fwd 5'- CCAAATGGGCTTGAAGCT -3'<br>rev 5'- gtagcacattctgtccctaa -3'           | 100               | NM_002421        |
| <i>MMP2</i>   | human   | fwd 5'- AGATGCCTGGAATGCCAT -3'<br>rev 5'- GGTTCTCCAGCTTCAGGTAAT -3'          | 107               | NM_004530        |
| <i>TIMP1</i>  | human   | fwd 5'- GGGGACACCAGAAGTCAACCAGA -3'<br>rev 5'- CTTTTTCAGAGCCTTGGAGGAGCT -3'  | 400               | NM_003254        |
| <i>TIMP3</i>  | human   | fwd 5'- CTACACCATCAAGCAGATGAAGAT -3'                                         | 455               | NM_000362        |

|              |       |     |                                    |     |           |
|--------------|-------|-----|------------------------------------|-----|-----------|
|              |       | rev | 5'- TCCAGGGGTCTGTGGCATTGAT -3'     |     |           |
| <i>TNC</i>   | human | fwd | 5'- GCTCAACCATCACTGCCAAGT -3'      | 81  | NM_002160 |
|              |       | rev | 5'- CAGTTTCCGACTGAACCTCAGTAG -3'   |     |           |
| <i>KLF4</i>  | human | fwd | 5'- CGACGCGCTGCTCCCATCTT -3'       | 97  | NM_004235 |
|              |       | rev | 5'- CCGCCAGCGGTTATTCGGGG -3'       |     |           |
| <i>CDH1</i>  | human | fwd | 5'- TACGCCTGGGACTCCACCTA -3'       | 101 | NM_004360 |
|              |       | rev | 5'- CCAGAAACGGAGGCCTGAT -3'        |     |           |
| <i>HMGA2</i> | human | fwd | 5'- GACGTCCGGGCATTCATATAGG -3'     | 105 | NM_003483 |
|              |       | rev | 5'- TTGGTGTTCTAAACAGAGGATTCACT -3' |     |           |
| <i>GAPDH</i> | human | fwd | 5'- GGAGTCAACGGATTTGGTCGTA -3'     | 78  | NM_002046 |
|              |       | rev | 5'- GGCAACAATATCCACTTTACCA -3'     |     |           |

**Supplementary Table S2.** Oligonucleotides used in quantitative real-time PCR reactions for chromatin immunoprecipitation assays or in restriction enzyme methylation assays.

| Position relative to TSS*          | Primer Sequence                                                            | Product size (bp) |
|------------------------------------|----------------------------------------------------------------------------|-------------------|
| mouse <i>Cdh1</i> -108/+3 promoter | fwd 5'- GGCCCTGCAGTTCCTTGGCT -3'<br>rev 5'- AGTGAGCAGCGCAGAGGCTG -3'       | 111               |
| human <i>CDH1</i> -78/+26 promoter | fwd 5'- AGGTGAACCCTCAGCCAATCAGCG -3'<br>rev 5'- AGGTGCTTTGCAGTTCCGACGC -3' | 105               |

\*TSS = transcription start site

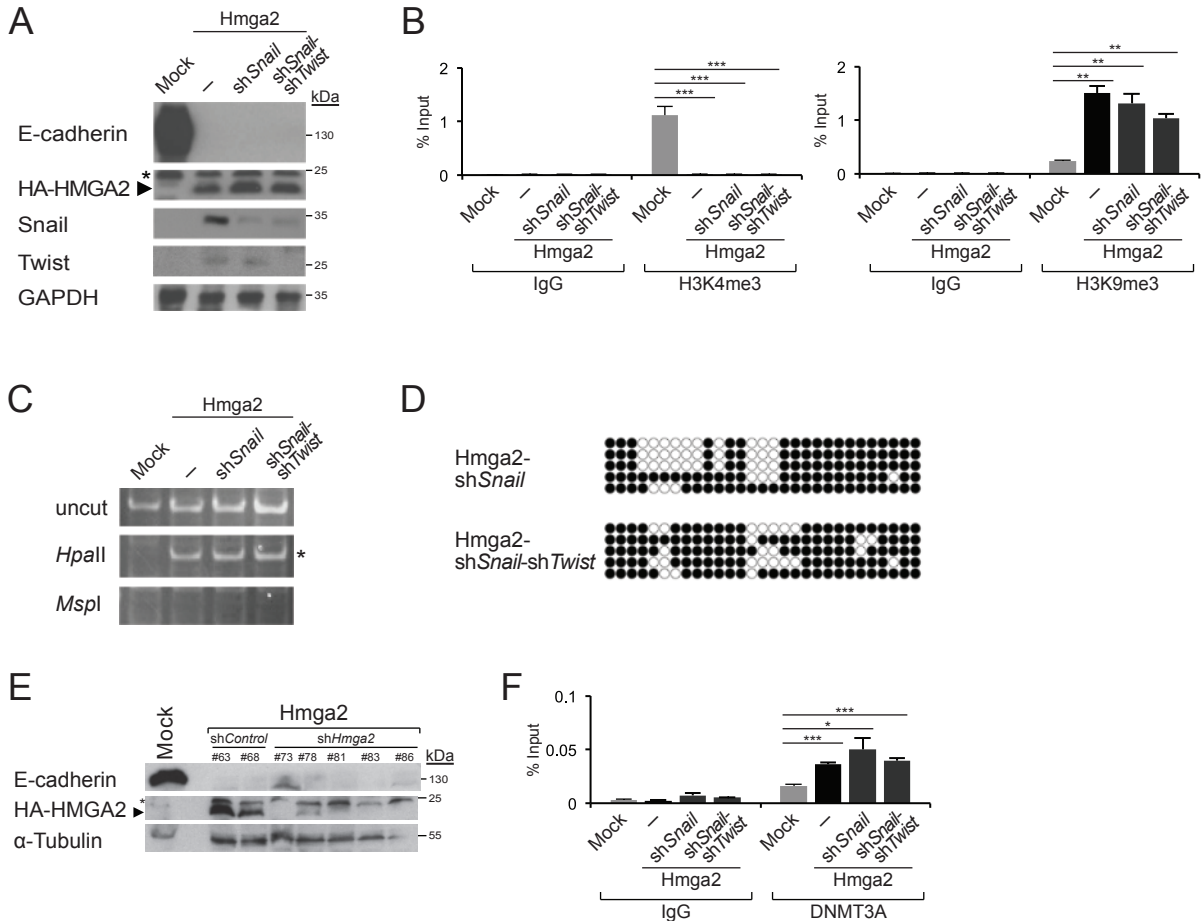

Figure S1: Epigenetic repression of the *Cdh1* promoter by HMGA2 is independent of Snail and Twist. (A) Immunoblots for E-cadherin, HA-tagged HMGA2, Snail and Twist in NM-Mock and NM-Hmga2 and its derivative stable clones (sh*Snail* and sh*Snail*-sh*Twist*). GAPDH serves as loading control. (B) ChIP-qPCR assays of active H3K4me3 and repressive H3K9me3 histone marks on the *Cdh1* promoter in cells described in panel A. (C) *HpaII*-*MspI* digestion-methylation assay of the *Cdh1* promoter in cells described in panel A. The PCR product was subjected to agarose gel electrophoresis and bands observed after *HpaII*-digestion indicate that the amplified DNA was methylated (asterisk). (D) DNA methylation status of the *Cdh1* promoter in NM-Hmga2 cells depleted of Snail or both Snail and Twist, was analysed by bisulphite sequencing of the *Cdh1* promoter region shown in Figure 1A, and 5 out of 10 clones of each cell line are shown here. White and black circles represent unmethylated and methylated CpG sites respectively. (E) Immunoblots for E-cadherin, HA-HMGA2 (arrowhead) and  $\alpha$ -tubulin in NM-Hmga2 cells depleted of HMGA2. Asterisk indicates an unspecific band. (F) ChIP-qPCR analysis with IgG or DNMT3A antibody on the *Cdh1* promoter in cells described in panel A.

# Supplementary Figure S2 Tan *et al.*

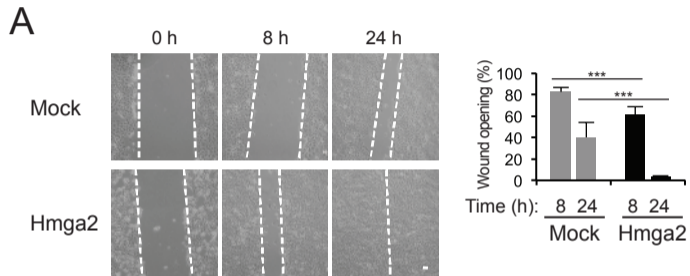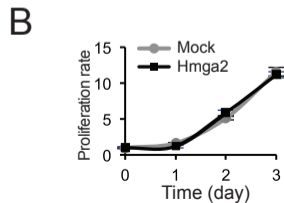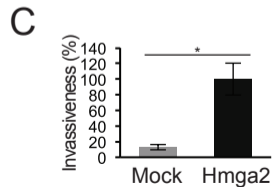

Figure S2: HMGA2 promotes migration and invasion. (A) Light microscopic images of NM-Mock and NM-Hmga2 cells in a wound healing assay at 0, 8 and 24 h after the wound. *Scale bar*, 50  $\mu\text{m}$ . Bar graph shows wound opening at 24 h as a percentage of original wound opening at 0 h (right panel; mean  $\pm$  SD from 9 fields). (B) MTS assay was performed over 3 days to measure cell proliferation rate in NM-Mock and NM-Hmga2 cells (mean  $\pm$  SD from 5 replicates). The proliferation rate is measured in arbitrary units (relative, normalised values). (C) Invasion ability of NM-Mock and NM-Hmga2 cells were assayed using a Matrigel transwell assay. The bar graph shows invasion rate relative to NM-Hmga2 cells, which is set to 100% (mean  $\pm$  SD values from triplicates). The experiments were done at least twice.

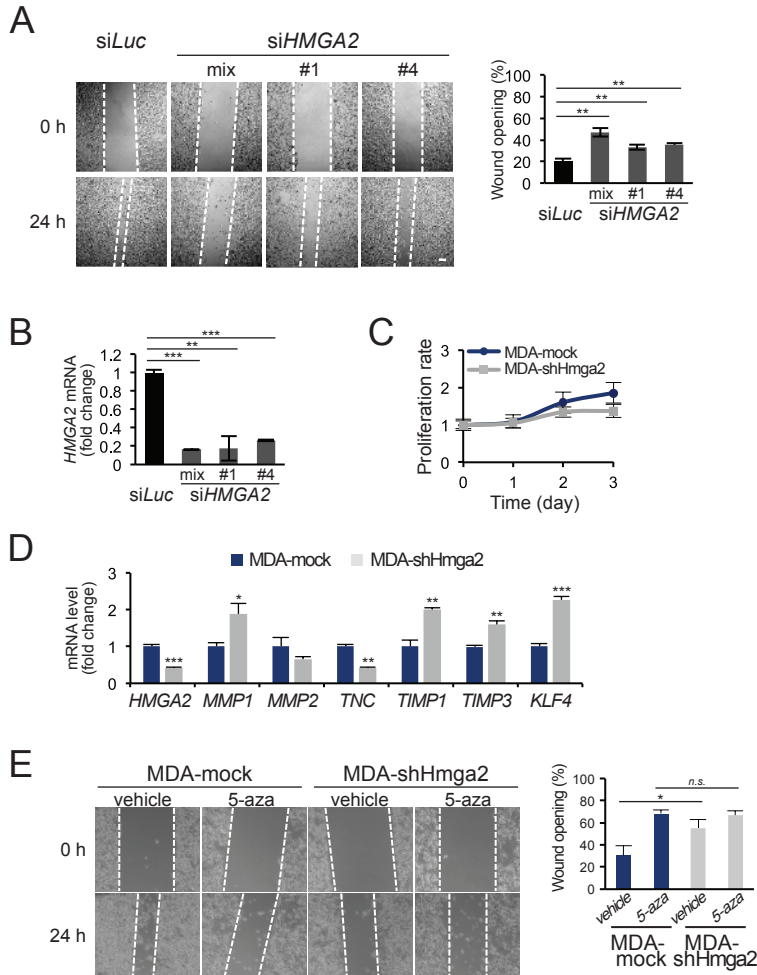

Figure S3. HMGA2 promotes cell migration in breast cancer cells. (A) Wound healing assay in MDA-MB-231 cells transiently transfected with control siRNA (*siLuc*) or two distinct siRNAs against HMGA2 (#1, #4) and their combination (mix). Bar graph represents the percentage of wound opening at 24 h as a percentage of original wound opening at 0 h (right panel; mean  $\pm$  SD from three independent measurements). (B) Knockdown efficiency of HMGA2 in cells used in the wound healing assay in panel A and analysed by qPCR (mean  $\pm$  SD from triplicate values). (C) MTS assay was performed over the course of 3 days, as described in Supplementary Figure S2B, to measure cell proliferation rate in MDA-mock and MDA-shHmga2 cells (mean  $\pm$  SD from 5 replicates). (D) Expression levels of genes, *HMGA2*, *MMP1*, *MMP2*, *TNC*, *TIMP1*, *TIMP3* and *KLF4*, normalised to *GAPDH* mRNA levels in MDA-mock and MDA-shHmga2 cells. Expression levels in MDA-mock cell are normalised to 1. (E) Wound healing assay of MDA-mock and MDA-shHmga2 cells treated with vehicle or 5-aza, as described in Figure 2C. Bar graph shows wound opening at 24 h as a percentage of original wound opening at 0 h (right panel; mean  $\pm$  SD from 9 fields).



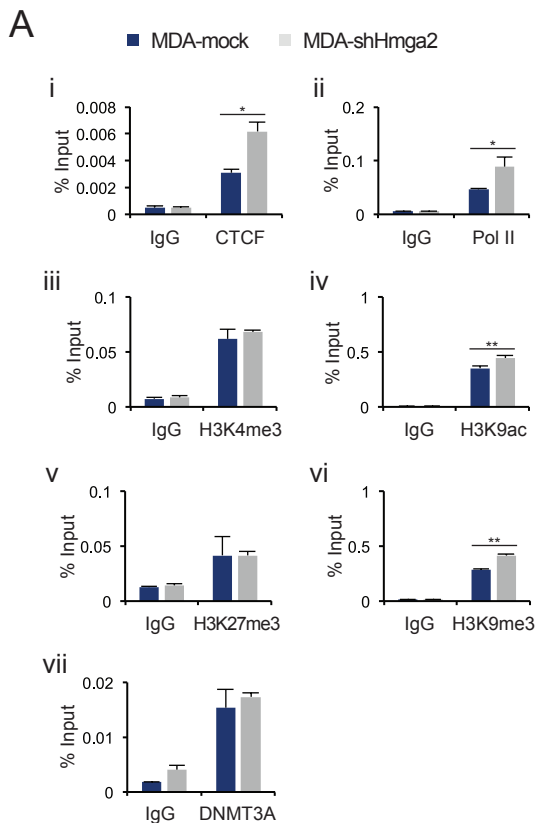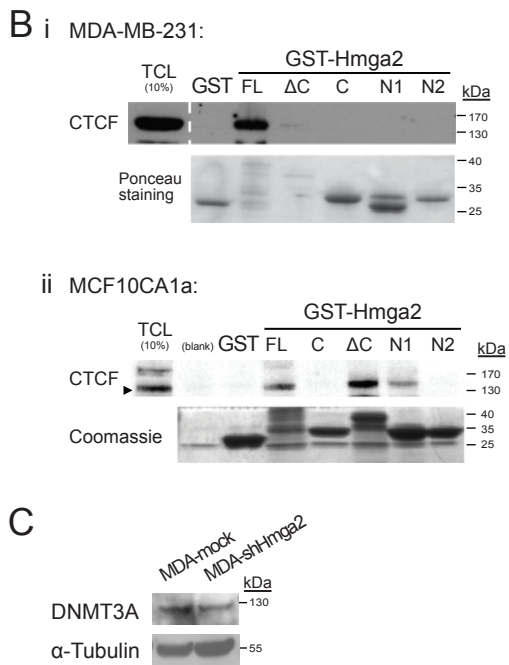

Figure S4. HMGA2 interacts with CTCF in breast cancer cells. (A) ChIP-qPCR analyses of CTCF (*i*); Pol II (*ii*); H3K4me3 (*iii*); H3K9ac (*iv*); H3K27me3 (*v*); H3K9me3 (*vi*); and DNMT3A (*vii*) binding on the *CDH1* promoter in MDA-mock and MDA-shHmga2 cells. (B) GST-HMGA2 and its deletion mutants were used in a pull-down assay with parental MDA-MB-231 (*i*) or MCF10CA1a (*ii*) cell extracts and immunoblotted for CTCF. Input of GST fusion proteins used in the pull-down were visualised by Ponceau-S or coomassie brilliant blue staining. *FL*, full-length;  $\Delta C$ , deletion of C-terminal; *N1*, N-terminal 1; *N2*, N-terminal 2; *C*, C-terminal; *TCL*, total cell lysate. (C) DNMT3A and GAPDH protein levels in MDA-control and -shHmga2 cells.
